# Supplementary material for: Formation of a novel type of reverse microemulsion system and its application in synthesis of the nanostructured La0.95Ba0.05MnAl11O19 catalystElectronic supplementary information (ESI) available: Table 1, Figs. 1b, 5, 6 and 7. See http://www.rsc.org/suppdata/cc/b4/b404133j/
Source: Royal Society of Chemistry journal article supplement (doi:10.1039/b404133j), 2004-01-01
Supplement: b404133j-fig5.pdf [file b404133j-fig5.pdf]

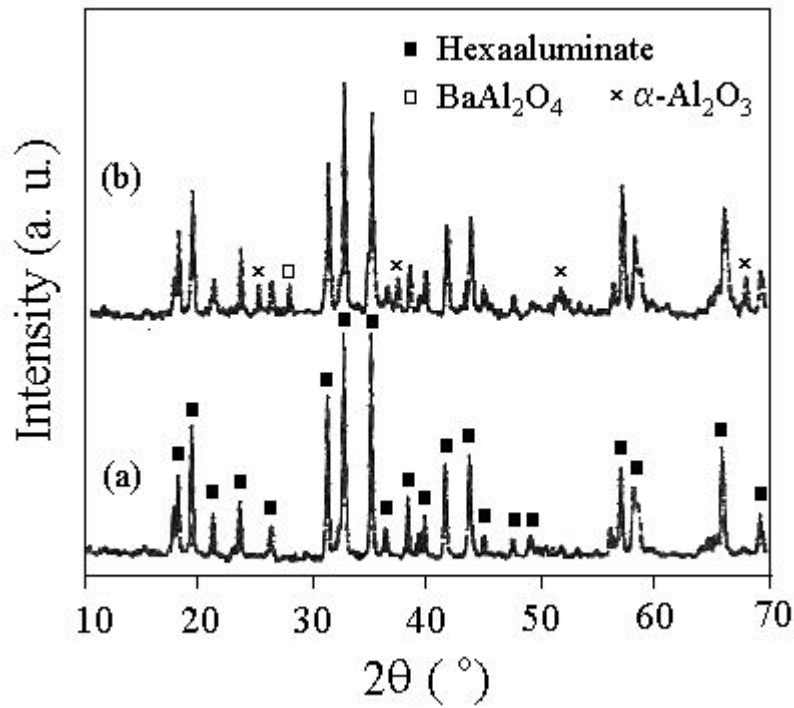

**Fig. 5** XRD patterns of the  $\text{La}_{0.95}\text{Ba}_{0.05}\text{MnAl}_{11}\text{O}_{19}$  catalysts prepared in different systems: (a) the novel microemulsion system: Water/PrOH/BuOH=12.5:12.5:75 (vol.%),  $\text{M}(\text{OR})_x/\text{water}=1/100$  (mole ratio) (b) pure water
