# Supplementary material for: Formation of a novel type of reverse microemulsion system and its application in synthesis of the nanostructured La0.95Ba0.05MnAl11O19 catalystElectronic supplementary information (ESI) available: Table 1, Figs. 1b, 5, 6 and 7. See http://www.rsc.org/suppdata/cc/b4/b404133j/
Source: Royal Society of Chemistry journal article supplement (doi:10.1039/b404133j), 2004-01-01
Supplement: b404133j-table1.pdf [file b404133j-table1.pdf]

**Table 1**

The preparation and specific surface area of the  $\text{La}_{0.95}\text{Ba}_{0.05}\text{MnAl}_{11}\text{O}_{19}$  catalysts

| Catalysts ID | Composition                                                     | W/P* | W/B* | SSA* |
|--------------|-----------------------------------------------------------------|------|------|------|
| LMBA-1       | $\text{La}_{0.95}\text{Ba}_{0.05}\text{MnAl}_{11}\text{O}_{19}$ | 1:1  | 1:1  | 35.5 |
| LMBA-2       | $\text{La}_{0.95}\text{Ba}_{0.05}\text{MnAl}_{11}\text{O}_{19}$ | 1:1  | 1:2  | 53.0 |
| LMBA-3       | $\text{La}_{0.95}\text{Ba}_{0.05}\text{MnAl}_{11}\text{O}_{19}$ | 1:1  | 1:3  | 64.7 |
| LMBA-4       | $\text{La}_{0.95}\text{Ba}_{0.05}\text{MnAl}_{11}\text{O}_{19}$ | 1:1  | 1:4  | 54.7 |
| LMBA-5       | $\text{La}_{0.95}\text{Ba}_{0.05}\text{MnAl}_{11}\text{O}_{19}$ | 1:0  | 1:2  | 17.3 |
| LMBA-6       | $\text{La}_{0.95}\text{Ba}_{0.05}\text{MnAl}_{11}\text{O}_{19}$ | 1:3  | 1:1  | 28.0 |
| LMBA-7       | $\text{La}_{0.95}\text{Ba}_{0.05}\text{MnAl}_{11}\text{O}_{19}$ | 1:4  | 1:2  | 22.5 |
| LMBA-8       | $\text{La}_{0.95}\text{Ba}_{0.05}\text{MnAl}_{11}\text{O}_{19}$ | 1:5  | 1:4  | 27.0 |
| LMBA-9       | $\text{La}_{0.95}\text{Ba}_{0.05}\text{MnAl}_{11}\text{O}_{19}$ | 1:1  | 1:0  | 15.5 |

\*Notes: Preparation:  $\text{M}(\text{OR})_x/\text{water}=1/100$  (mole ratio); W/P, the volume ratio of water to 2-propanol; W/B, the volume ratio of water to n-butanol; SSA, Specific surface area
