# Supplementary figures and images for: Formation of a novel type of reverse microemulsion system and its application in synthesis of the nanostructured La0.95Ba0.05MnAl11O19 catalystElectronic supplementary information (ESI) available: Table 1, Figs. 1b, 5, 6 and 7. See http://www.rsc.org/suppdata/cc/b4/b404133j/
Source: Royal Society of Chemistry journal article supplement (doi:10.1039/b404133j), 2004-01-01

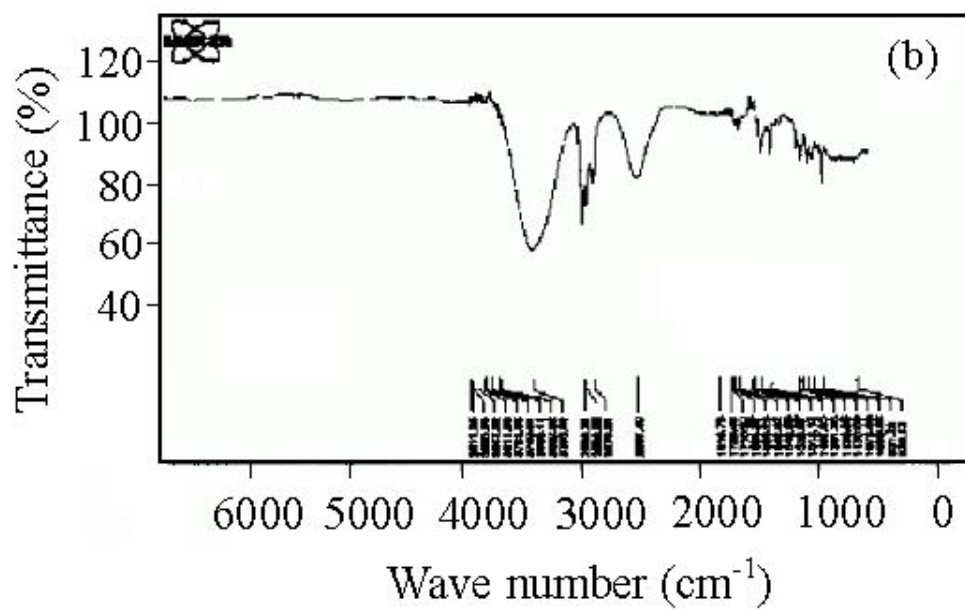

**Fig. 1b** Infrared (IR) spectrum of pure H<sub>2</sub>O (b): Measurement at 25°C, CaF crystal as lens, MCT Detector

Supplement: b404133j-fig1b.pdf [file b404133j-fig1b.pdf]
